# Supplementary material
Source: publisher figshare collection journal article supplement (https://springernature.figshare.com/ndownloader/files/20553081)
Supplement: Supplementary file [file 20553081]

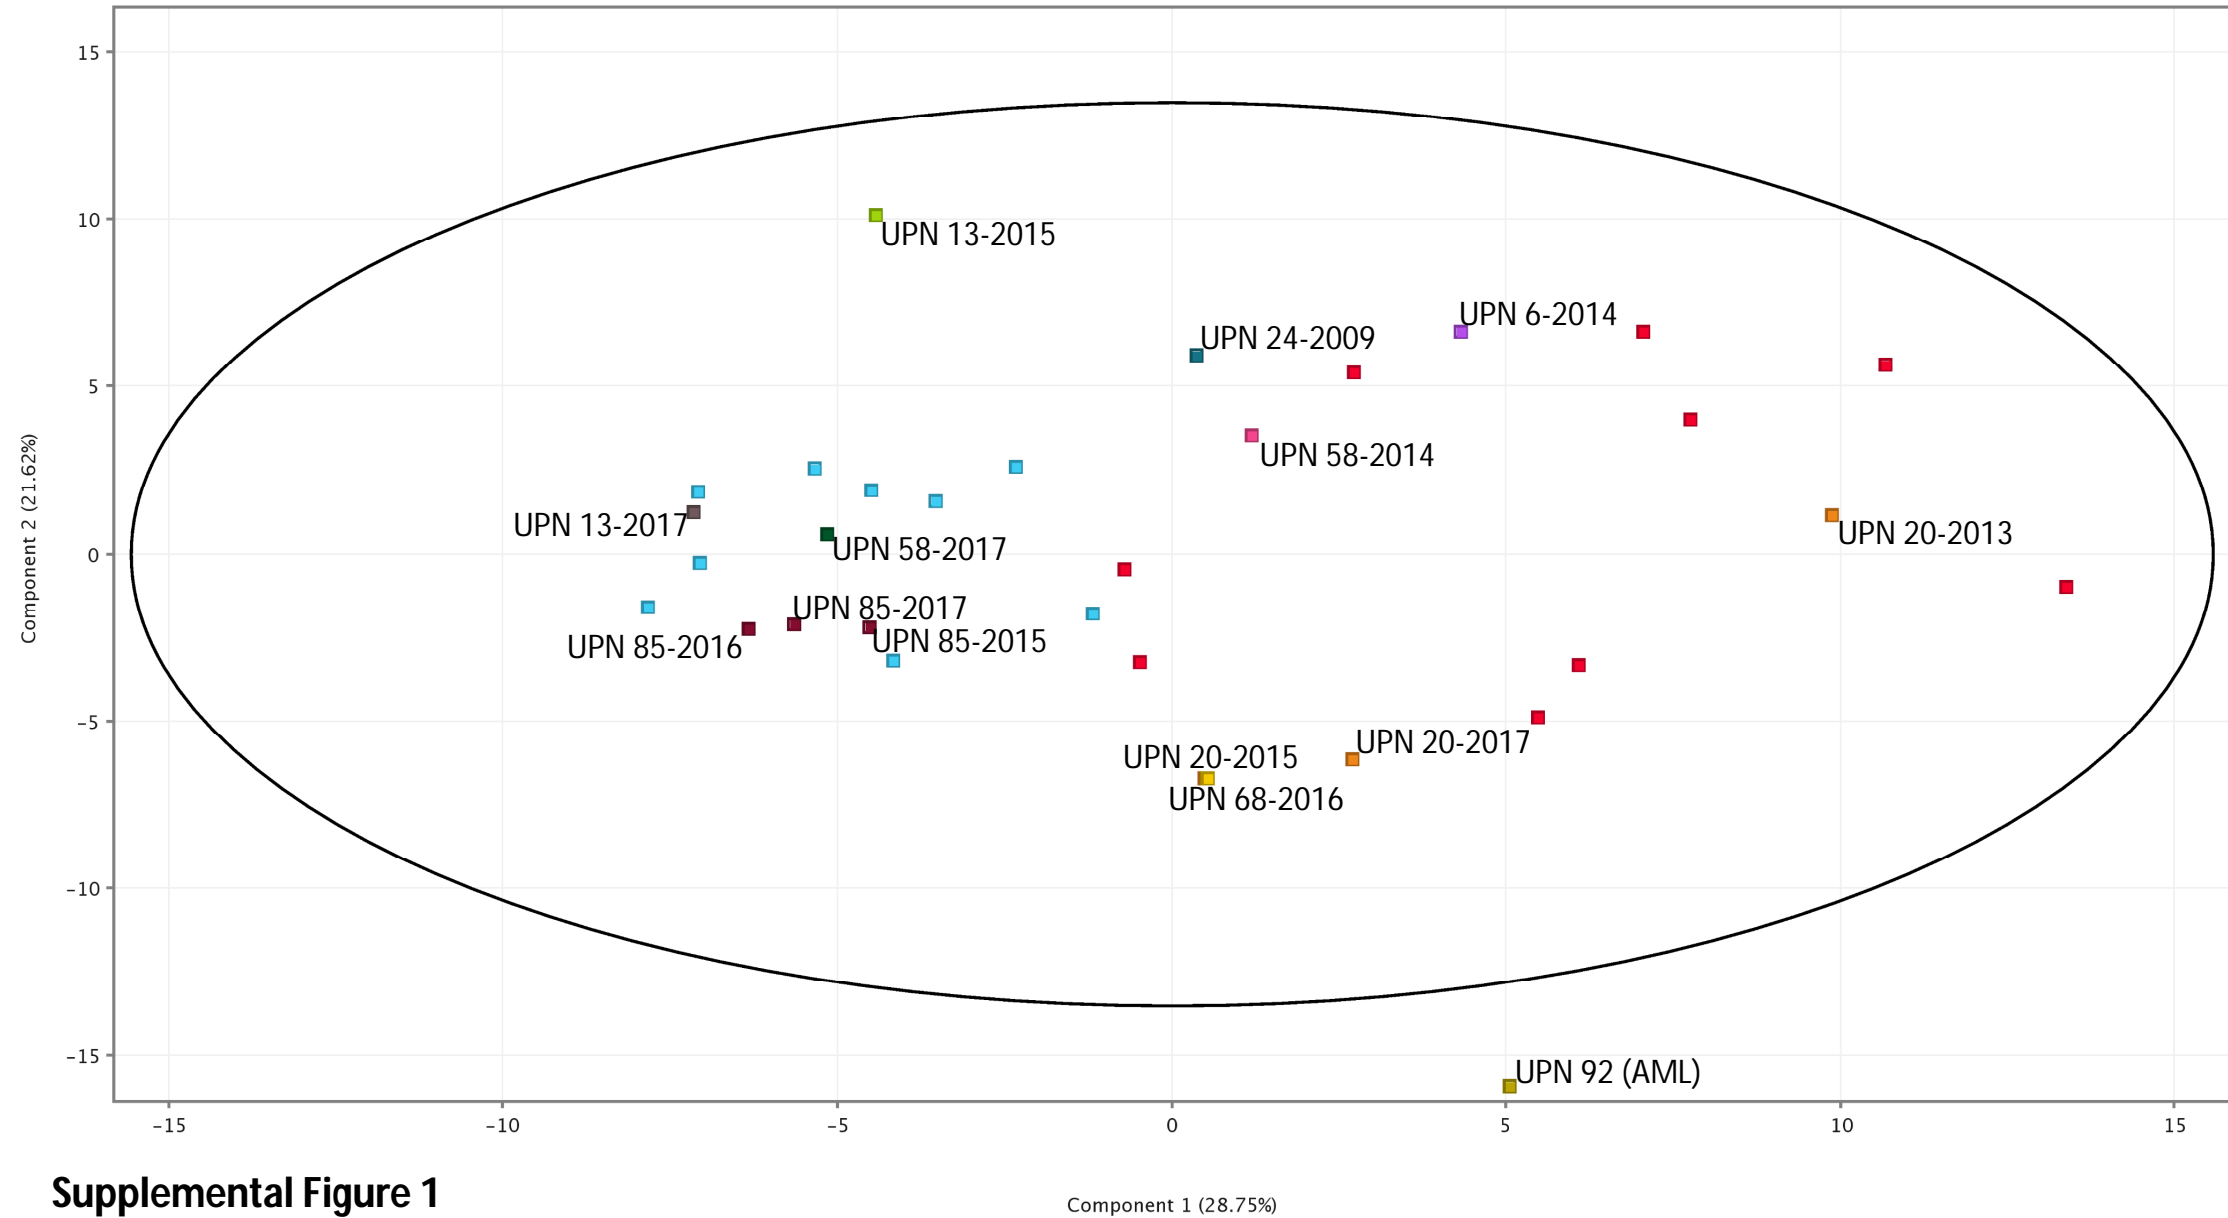

**Supplemental Fig. 1** Principal Component Analysis (PCA) plot for the Gene set 1 (KEGG Hematopoietic cell lineage). Healthy controls, SDS-NK patients, and patients with chromosome anomalies are identified as in Fig. 2 and in the text. Component 1 and 2 are indicated in the plot. The 95% confidence interval is shown by a black ellipse.

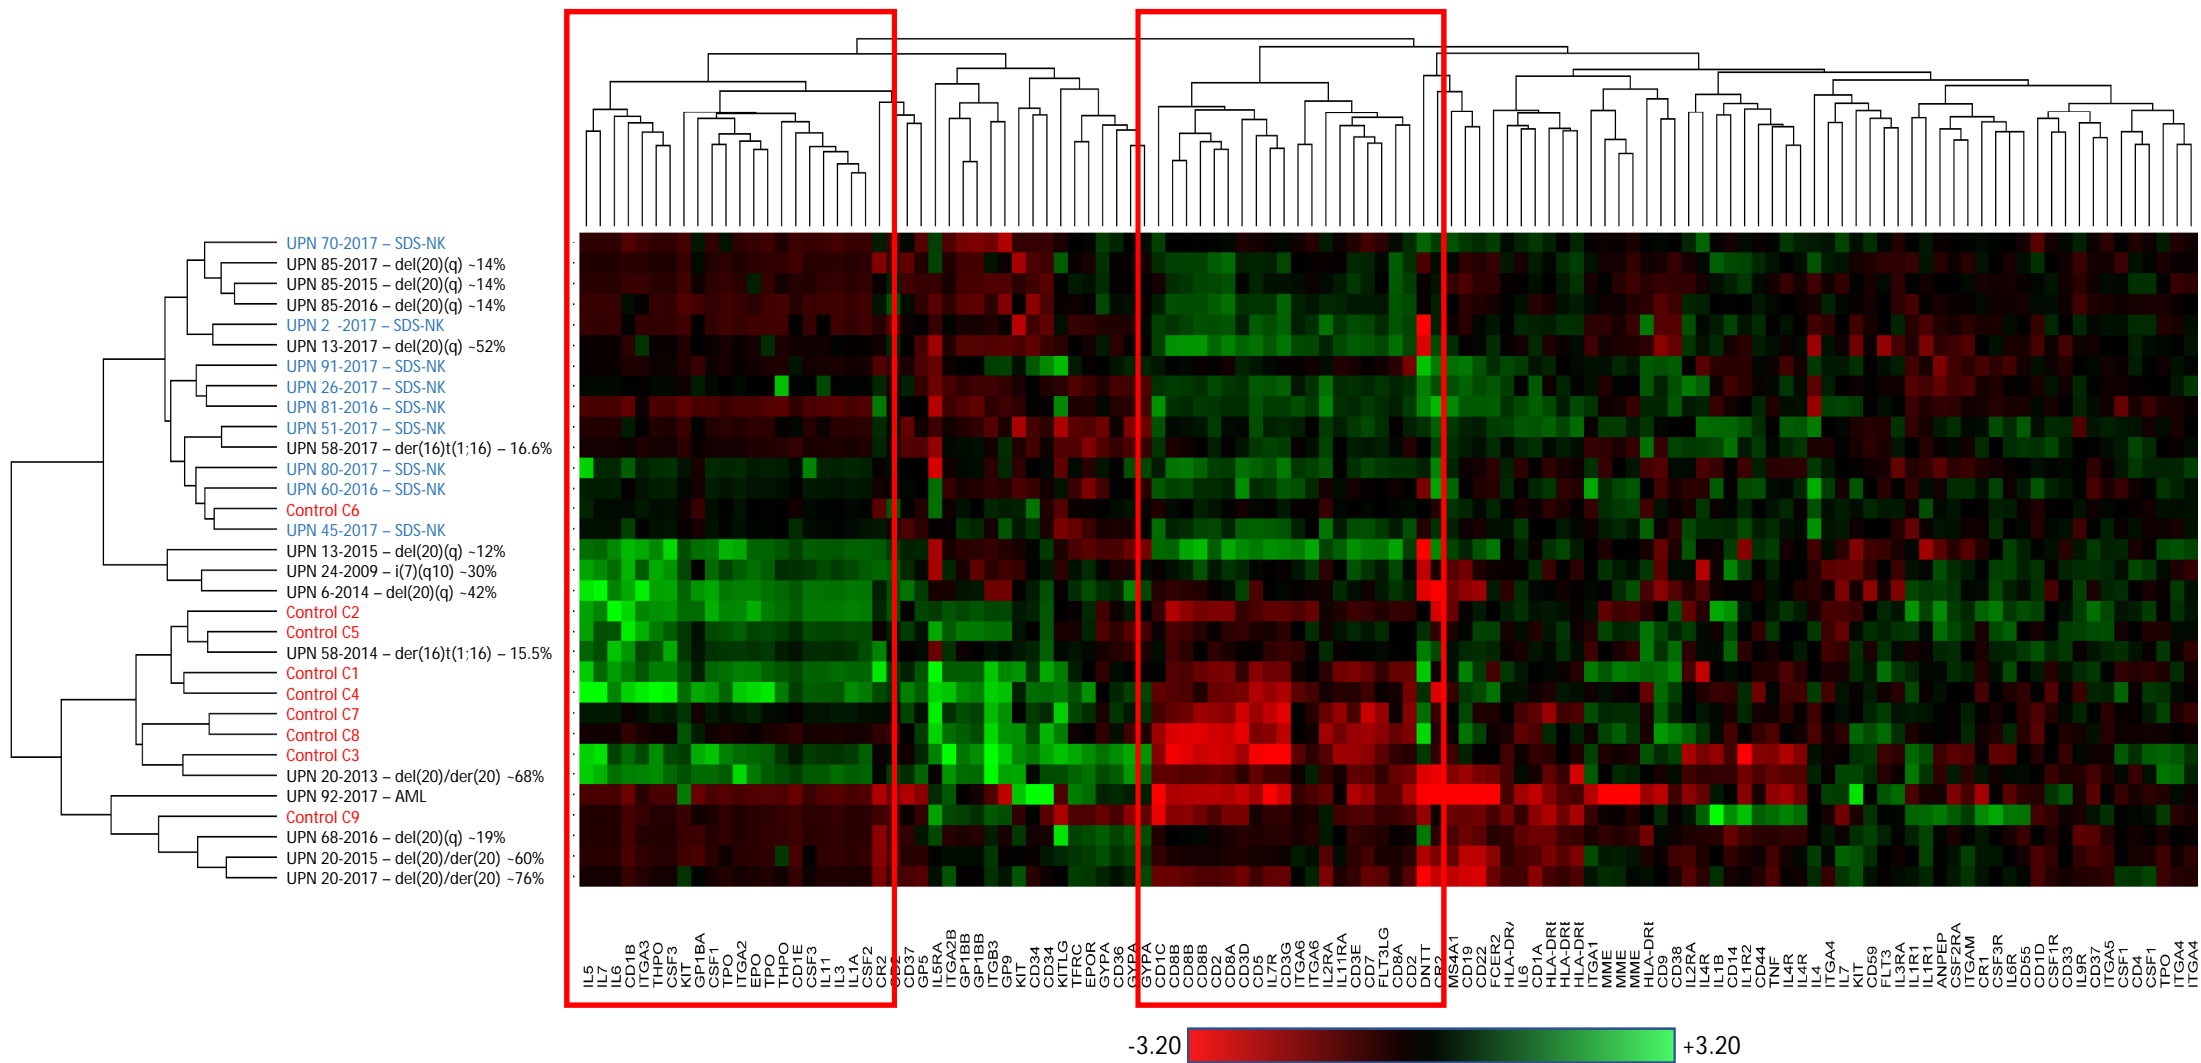

**Supplemental Figure 2:** KEGG Hematopoietic Cell Lineage

**Supplemental Fig. 2** Heatmap and dendrogram of cluster analysis on both the axes for the Gene set 1 (KEGG Hematopoietic Cell Lineage). Healthy controls, SDS-NK and patients with chromosome anomalies are indicated near the dendrogram lines, with evidence of the sample (year), and the karyotype, as in Fig. 3 in the text. Two red boxes put in evidence genes with relevant differences of expression, related to the subgroups of controls and SDS-NK. Gene names and  $\log_2$  color bar are under the heatmap.

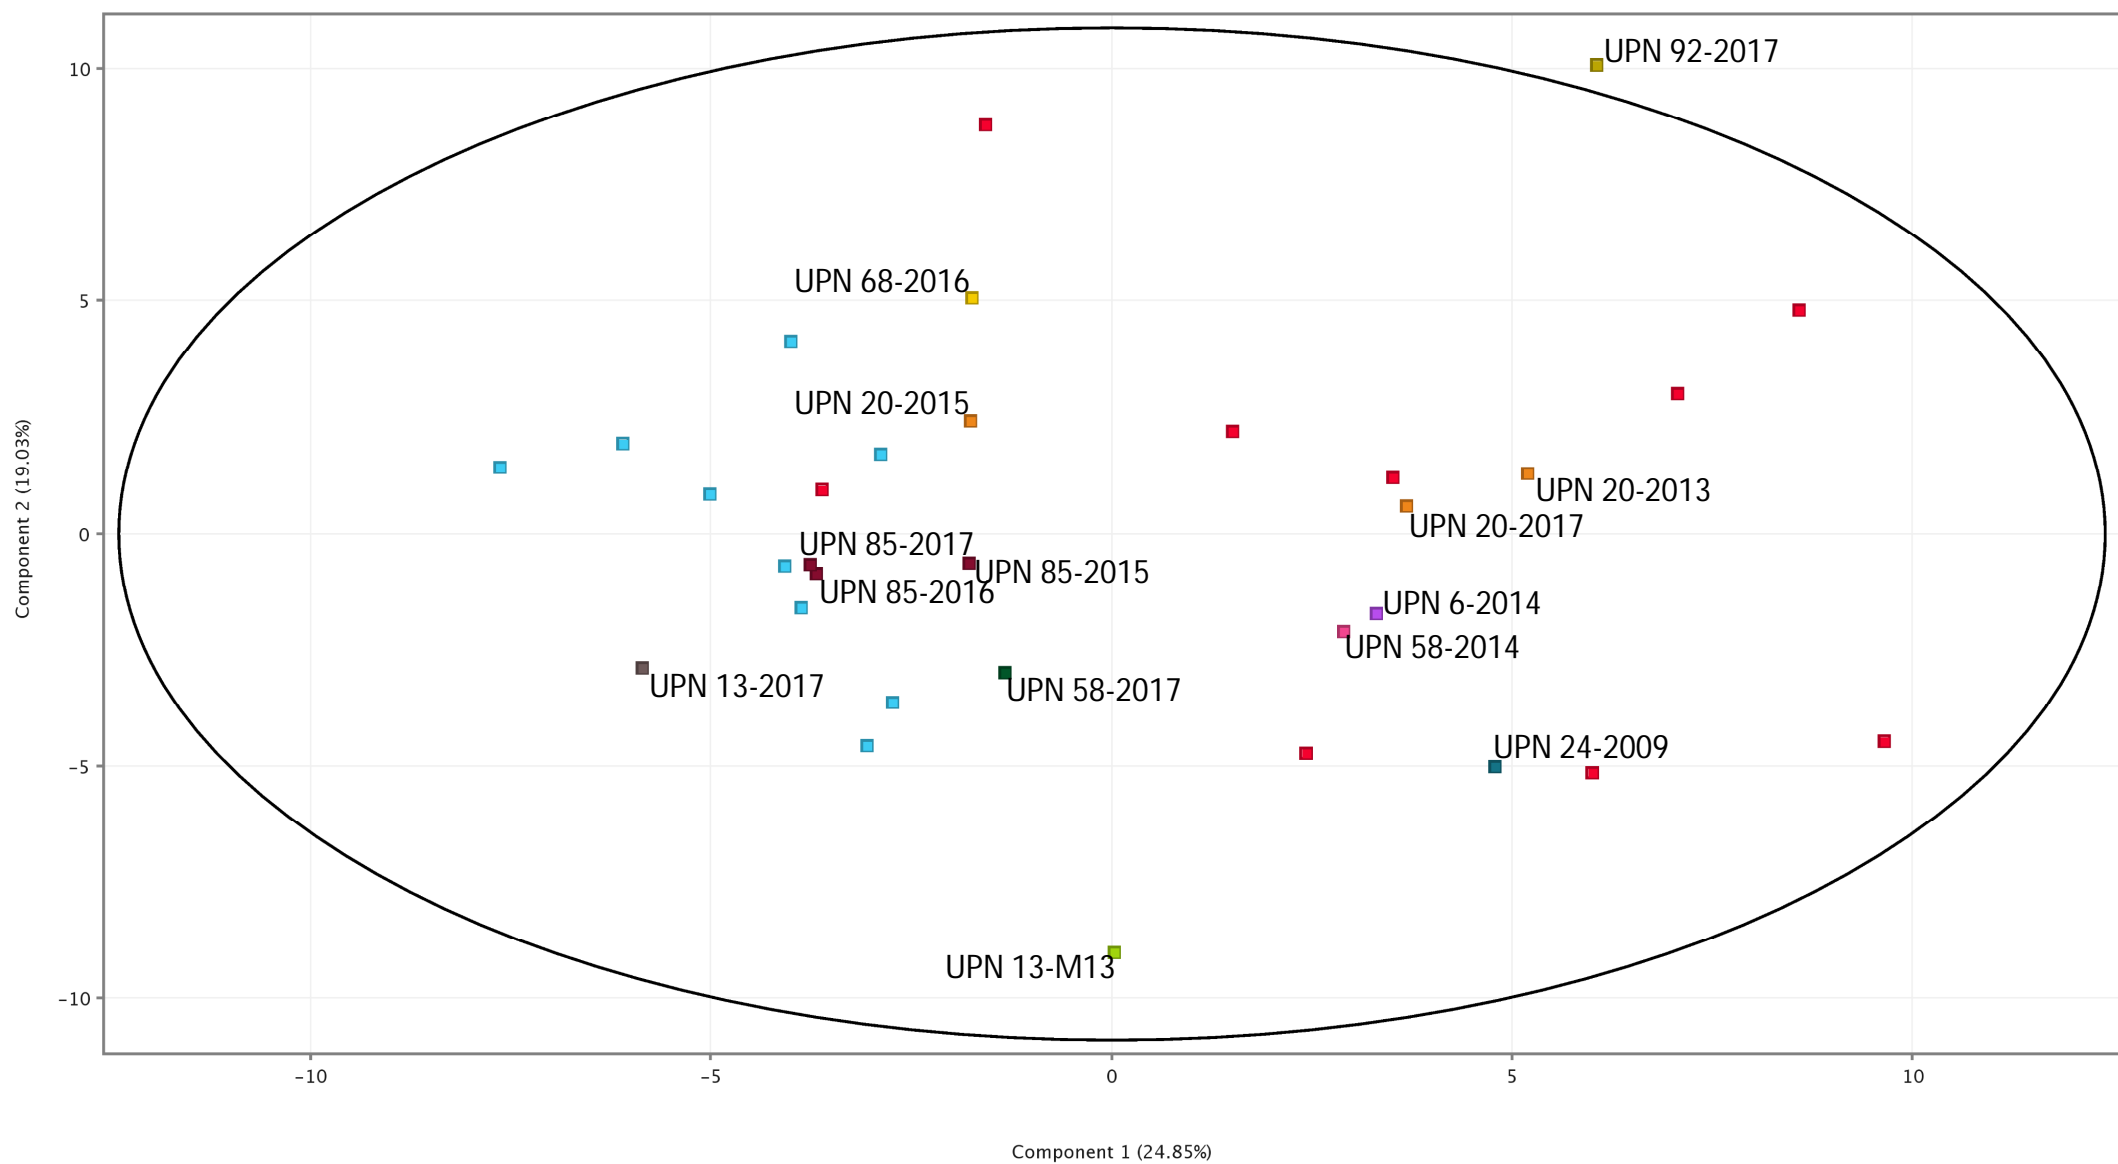

**Supplemental Figure 3:** KEGG Acute Myeloid Leukemia

**Supplemental Fig. 3** Principal Component Analysis (PCA) plot for the Gene set 2 (KEGG Acute myeloid leukaemia). Healthy controls, SDS-NK patients, and patients with chromosome anomalies are identified as in Fig. 2 and in the text. Component 1 and 2 are indicated in the plot. The 95% confidence interval is shown by a black ellipse.

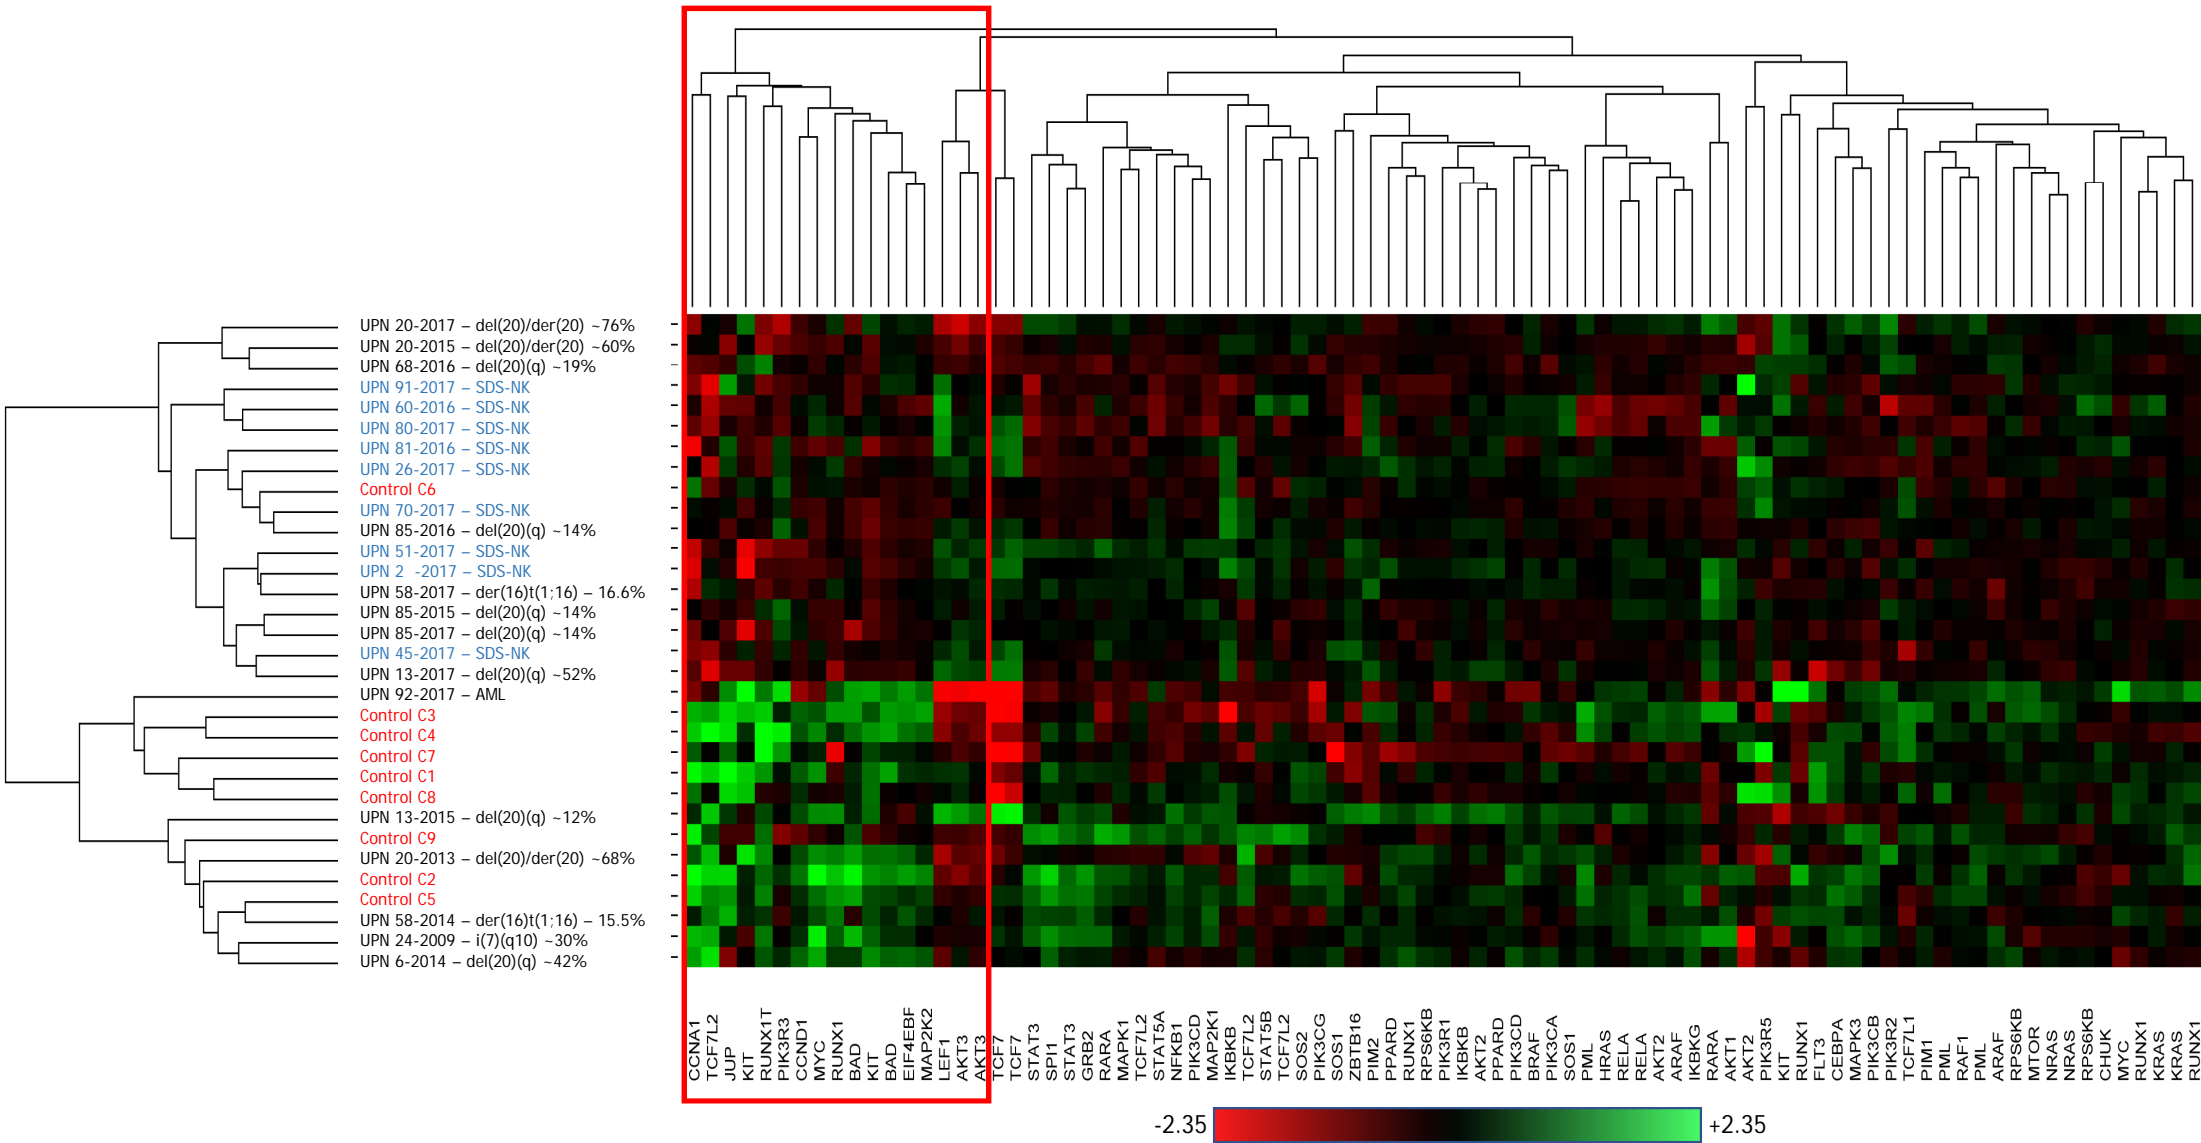

**Supplemental Figure 4:** KEGG Acute Myeloid Leukemia

**Supplemental Fig. 4** Heatmap and dendrogram of cluster analysis on both the axes for the Gene set 2 (KEGG Acute myeloid leukaemia). Healthy controls, SDS-NK and patients with chromosome anomalies are indicated near the dendrogram lines, with evidence of the sample (year), and the karyotype, as in Fig. 3 in the text. A red box put in evidence genes particularly up/down-regulated, with difference in the groups of controls and SDS-NK. Gene names and  $\log_2$  color bar are under the heatmap.



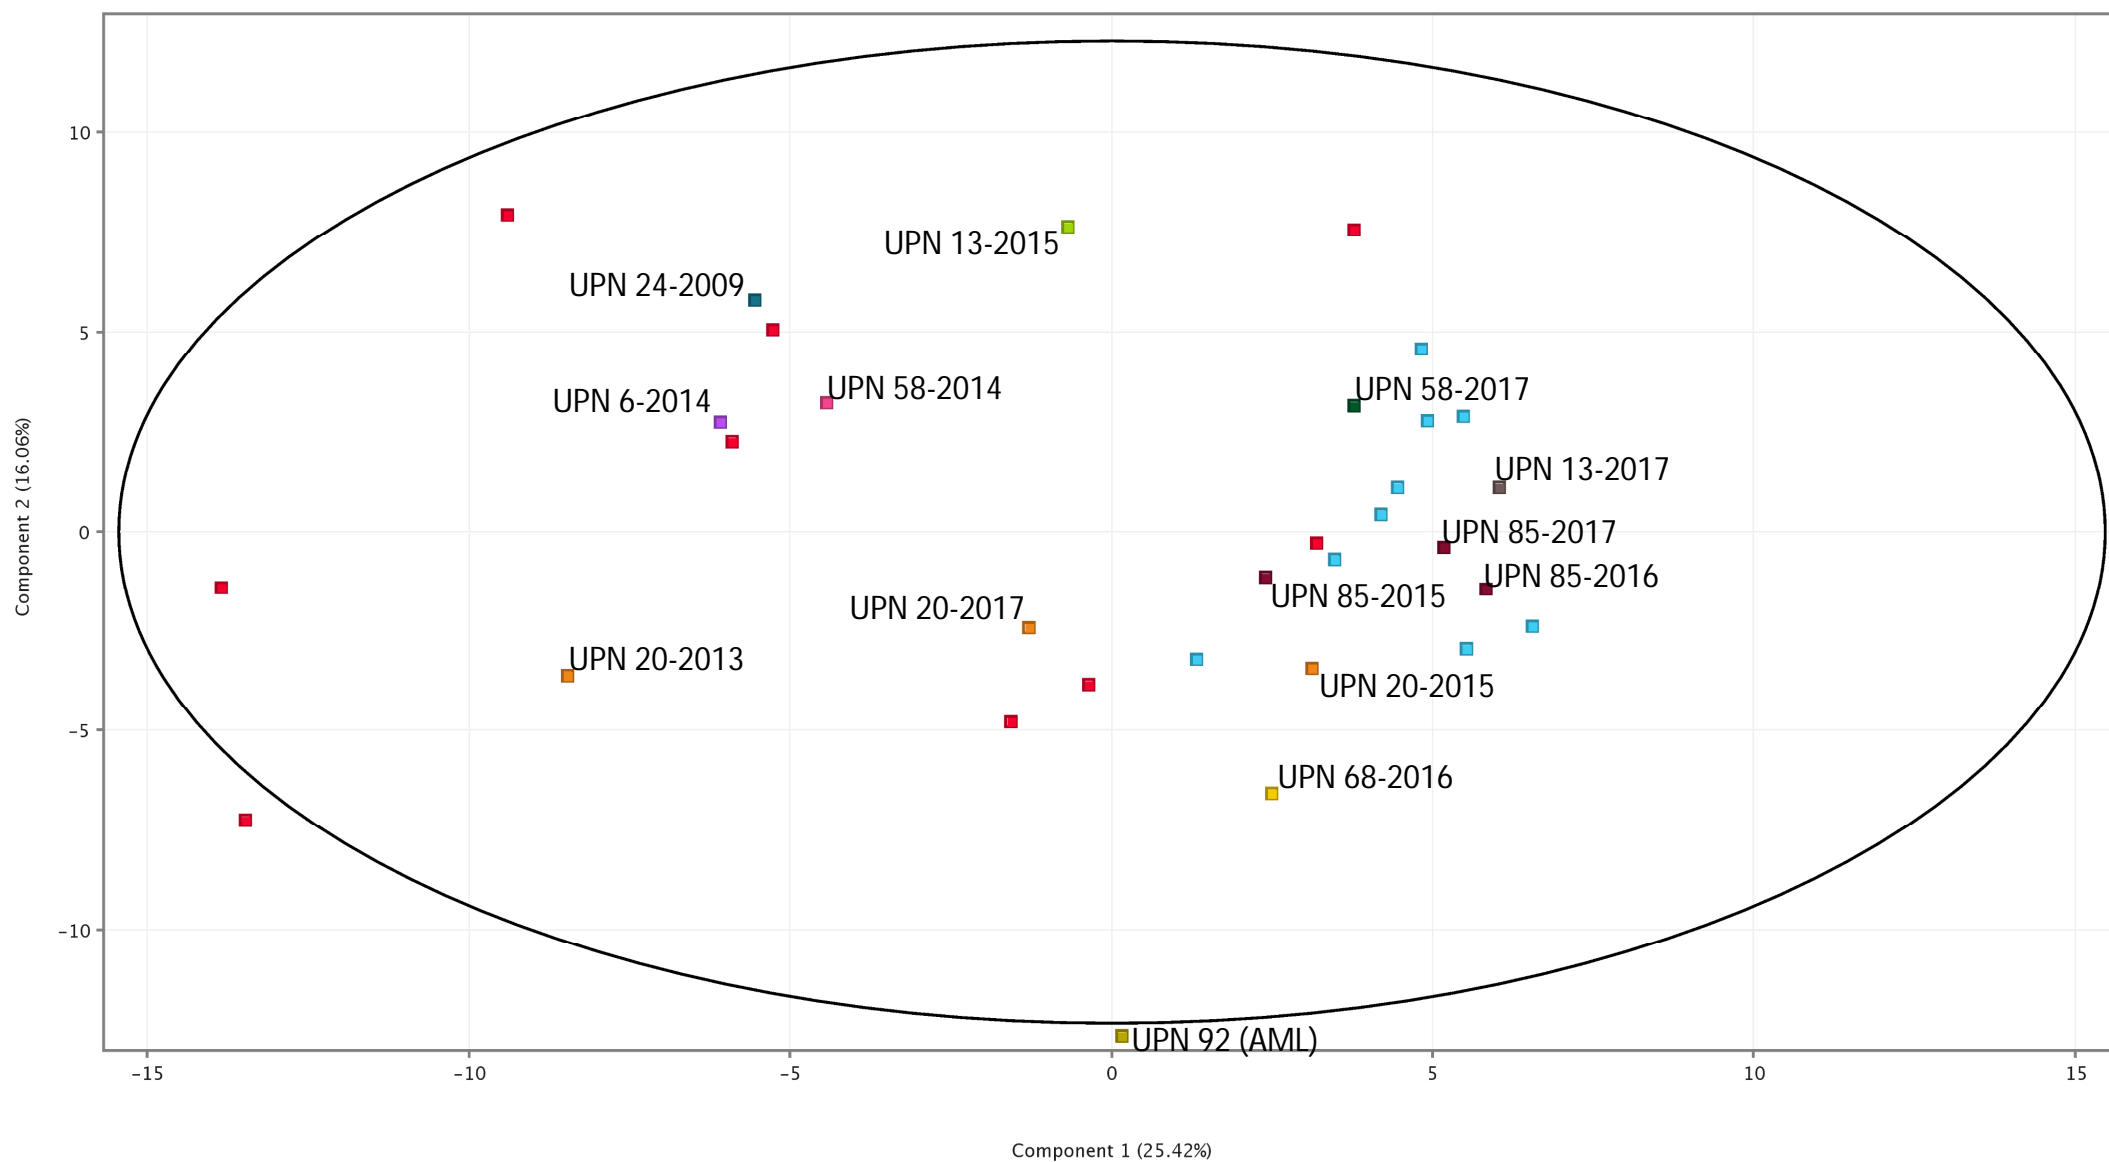

**Supplemental Figure 5: Gene Ontology Myeloid Leukocyte Differentiation**

**Supplemental Fig. 5** Principal Component Analysis (PCA) plot for the Gene set 3 (Gene Ontology Myeloid Leukocyte Differentiation). Healthy controls, SDS-NK patients, and patients with chromosome anomalies are identified as in Fig. 2 and in the text. Component 1 and 2 are indicated in the plot. The 95% confidence interval is shown by a black ellipse.



**Supplemental Fig. 6** Heatmap and dendrogram of cluster analysis on both the axes for the Gene set 3 (Gene Ontology Myeloid Leukocyte Differentiation). Healthy controls, SDS-NK and patients with chromosome anomalies are indicated near the dendrogram lines, with evidence of the sample (year), and the karyotype, as in Fig. 3 in the text. A red arrow and a red box put in evidence genes particularly up/down-regulated, with difference in the groups of controls and SDS-NK. Gene names and  $\log_2$  color bar are under the heatmap.
